# Supplementary material for: 3DPhenoFish: Application for two- and three-dimensional fish morphological phenotype extraction from point cloud analysis
Source: PubMed Central journal article supplement — Zool Res. 2021 Jul 18;42(4):492–501. doi: 10.24272/j.issn.2095-8137.2021.141 (PMC8317184; doi:10.24272/j.issn.2095-8137.2021.141), 2021-07-18
Supplement: zr-42-4-492-S1.pdf [file zr-42-4-492-S1.pdf]

## Supplementary Tables and Figures

**Supplementary Table S1. Pearson correlation coefficients ( $r$ ) between calculated and measured phenotypes. Labels in parentheses are key points in Figure 6.**

| Morphological phenotype     | Correlation coefficient ( $r$ ) |
|-----------------------------|---------------------------------|
| Full length (SV)            | 0.9998                          |
| Body length (SU)            | 0.9983                          |
| Head length (ST)            | 0.9833                          |
| Body height (WY)            | 0.9913                          |
| Caudal peduncle height (OL) | 0.9899                          |
| Caudal peduncle length (ZU) | 0.9836                          |
| Dorsal snout distance (SX)  | 0.9936                          |
| Snout length (AB)           | 0.9716                          |
| Eye diameter (BC)           | 0.9545                          |
| Head behind eye length (CD) | 0.9795                          |
| Anal ventral distance (HJ)  | 0.9801                          |
| Dorsal length (QP)          | 0.9514                          |
| Pectoral length (EF)        | 0.9602                          |
| Ventral length (HI)         | 0.9425                          |
| Anal length (JK)            | 0.9625                          |
| Tail length (UV)            | 0.9651                          |
| Dorsal tail distance (XU)   | 0.9850                          |

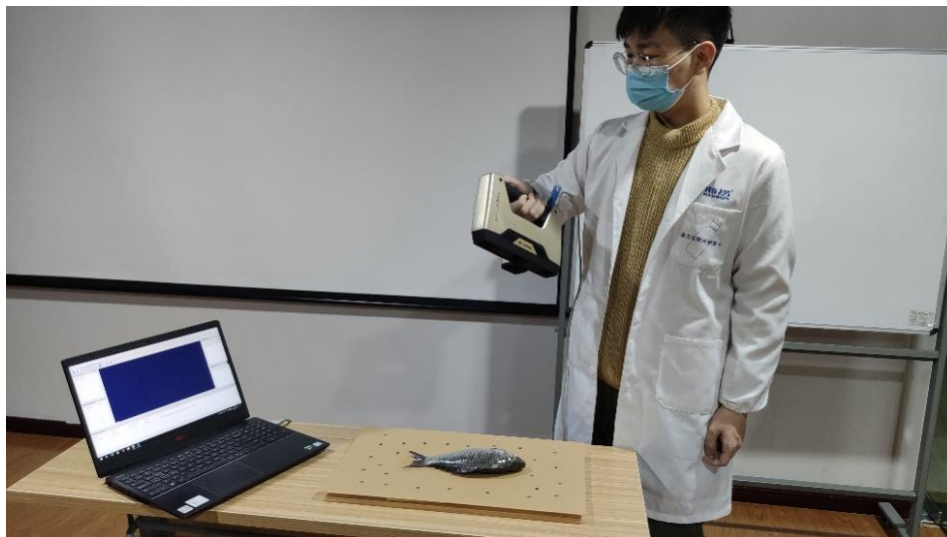

**Supplementary Figure S1. Data acquisition via non-contact fish scanning using GScan. Mark points were labeled on a yellow board as background. Point cloud was transferred directly to 3DPhenoFish for analysis.**

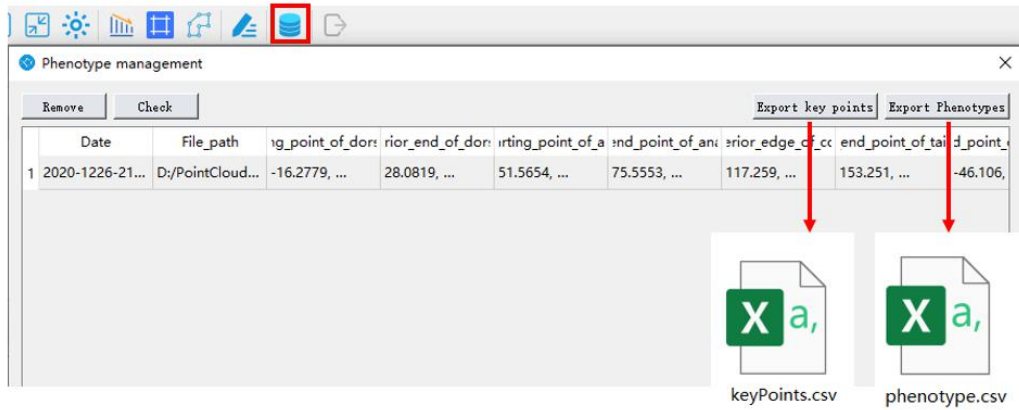

**Supplementary Figure S2. Phenotype data management and download for data sharing.**

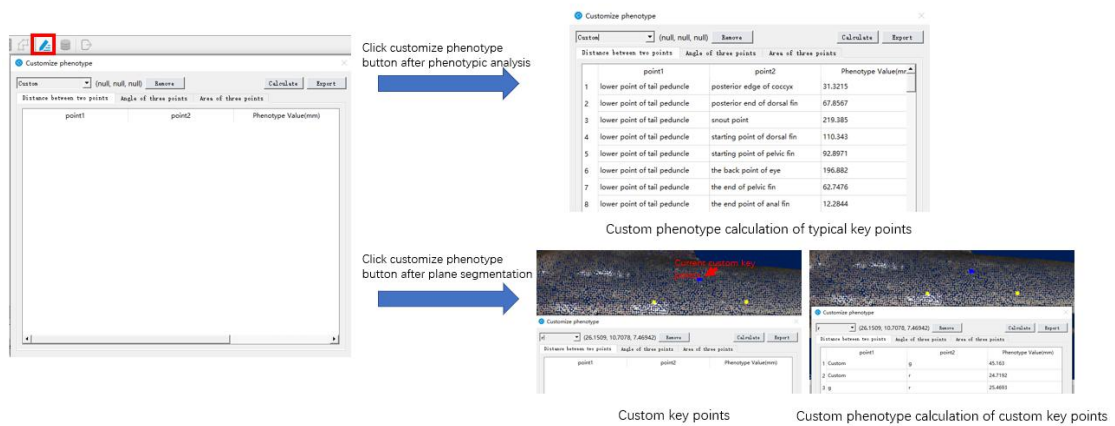

**Supplementary Figure S3. Key point adjustment and customized phenotype definition.**
